# Supplementary material for: Serum 25(OH)D and Type 2 Diabetes Association in a General Population
Source: Oxford University Press journal article supplement (doi:10.2337/dc11-1309), 2012-06-12
Supplement: dc111309supplementarydata.pdf [file dc111309supplementarydata.pdf]

SUPPLEMENTARY DATA

**Supplementary Table 1.** Multiple logistic regression analyses of the cross-sectional association between baseline 25(OH)D status and diabetes prevalence.

| 25(OH)D* status<br>nmol/l | Diabetes prevalence ‡<br>% (n/n <sub>total</sub> ) | Risk of prevalent diabetes, OR (95%CI) |                           |                           |
|---------------------------|----------------------------------------------------|----------------------------------------|---------------------------|---------------------------|
|                           |                                                    | crude                                  | Adjusted (1) ‡            | Adjusted (2)              |
| <25                       | 14.7 (125/849)                                     | 2.15 (1.59;2.91)                       | 2.12 (1.53;2.93)          | 1.96 (1.35;2.86)          |
| ≥ 25-50                   | 11.4 (269/2358)                                    | 1.60 (1.23;2.09)                       | 1.50 (1.13;2.00)          | 1.59 (1.14;2.21)          |
| ≥ 50-75                   | 9.2 (178/1931)                                     | 1.26 (0.95;1.67)                       | 1.28 (0.95;1.72)          | 1.30 (0.92;1.83)          |
| ≥ 75                      | 7.4 (75/1008)                                      | 1.00 (reference)                       | 1.00 (reference)          | 1.00 (reference)          |
|                           | P<0.001                                            | P <sub>trend</sub> <0.001              | P <sub>trend</sub> <0.001 | P <sub>trend</sub> <0.001 |
| Per 10 nmol/l increase    |                                                    | 0.91 (0.88;0.94)                       | 0.92 (0.88;0.95)          | 0.92 (0.88;0.96)          |
|                           |                                                    | P<0.001                                | P<0.001                   | P<0.001                   |

\* Abbreviations: 25(OH)D, 25-hydroxy-vitamin-D; OR, odds ratio; CI, confidence interval.

† Prevalent diabetes at baseline was defined as having diabetes according to OGTT criteria (fasting plasma glucose ≥7.0, 2-hour plasma glucose ≥11.1 mmol/l), HbA1c criteria (HbA1c ≥6.5%), self-reported history of diabetes, and/or use of diabetes medication.

‡ Models were adjusted for (1) season of blood collection, sex, age, family history of diabetes, and BMI; (2) plus leisure time physical activity, dietary habits, alcohol consumption, smoking status, total energy intake, and social class.

**Supplementary Table 2.** Subgroup analyses of the association between baseline serum 25(OH)D and risk of prevalent and 5 year incident diabetes.

| Potential confounders      | Subgroups                   | Risk of incident diabetes *                        |                                 |
|----------------------------|-----------------------------|----------------------------------------------------|---------------------------------|
|                            |                             | OR (95% CI) per 10 nmol/l increase in 25(OH)D †,†† |                                 |
| Sex                        | Men                         | 0.96 (0.87;1.05)                                   |                                 |
|                            | women                       | 0.90 (0.80;1.01)                                   | P <sub>interaction</sub> =0.44  |
| Age                        | 30-45                       | 0.89 (0.78;1.00)                                   |                                 |
|                            | 50-60                       | 0.96 (0.87;1.05)                                   | P <sub>interaction</sub> =0.27  |
| Season                     | April-September             | 0.95 (0.88;1.04)                                   |                                 |
|                            | October-March               | 0.82 (0.70;0.96)                                   | P <sub>interaction</sub> =0.082 |
| BMI                        | <25 kg/m <sup>2</sup>       | 0.90 (0.77;1.06)                                   |                                 |
|                            | ≥ 25 kg/m <sup>2</sup>      | 0.92 (0.85;1.01)                                   | P <sub>interaction</sub> =0.72  |
| Social class               | Lower (1-3)                 | 1.04 (0.91;1.18)                                   |                                 |
|                            | Higher (4-5)                | 0.90 (0.82;0.98)                                   | P <sub>interaction</sub> =0.080 |
| Family history of diabetes | No                          | 0.96 (0.88;1.05)                                   |                                 |
|                            | Yes                         | 0.86 (0.74;0.99)                                   | P <sub>interaction</sub> =0.18  |
| Dietary habits             | Healthy                     | 0.93 (0.85;1.01)                                   |                                 |
|                            | less healthy                | 0.88 (0.72;1.08)                                   | P <sub>interaction</sub> =0.62  |
| Total energy intake        | < median                    | 0.91 (0.81;1.02)                                   |                                 |
|                            | ≥ median                    | 0.94 (0.85;1.04)                                   | P <sub>interaction</sub> =0.66  |
| Physical activity          | Sedentary                   | 0.98 (0.82;1.17)                                   |                                 |
|                            | Non-sedentary               | 0.93 (0.86;1.02)                                   | P <sub>interaction</sub> =0.63  |
| Smoking status             | Non-smoker                  | 0.96 (0.88;1.05)                                   |                                 |
|                            | Smoker                      | 0.89 (0.77;1.02)                                   | P <sub>interaction</sub> =0.33  |
| Alcohol consumption        | ≤ 14 drinks/week            | 0.93 (0.85;1.02)                                   |                                 |
|                            | >14 drinks/week             | 0.91 (0.79;1.06)                                   | P <sub>interaction</sub> =0.77  |
| Randomisation group        | Low intensity intervention  | 0.86 (0.70;1.06)                                   |                                 |
|                            | High intensity intervention | 0.95 (0.87;1.03)                                   | P <sub>interaction</sub> =0.39  |

\* incident diabetes was defined as having diabetes according to OGTT criteria, HbA1c criteria, a known history of diabetes, and/or use of diabetes medication among those without diabetes at baseline.

† Abbreviations: 25(OH)D, 25-hydroxy-vitamin-D; OR, odds ratio; CI, confidence interval; OGTT, oral glucose tolerance test; HbA1c, glycosylated haemoglobin.

†† Models were adjusted for season of blood collection, sex, age, family history of diabetes, BMI, change in weight during follow-up, leisure time physical activity, dietary habits, alcohol consumption, smoking status, total energy intake, social class, randomisation group, and self-reported changes in dietary habits, physical activity, smoking status, and alcohol consumption during follow-up.

SUPPLEMENTARY DATA

**Supplementary Table 3.** Multiple logistic regression analyses of the prospective association between baseline 25(OH)D status and 5 year diabetes incidence.

| Diabetes outcome | 25(OH)D* status        | Diabetes incidence                     | Risk of incident diabetes (OR (95% CI)) |                           |                           |                           |
|------------------|------------------------|----------------------------------------|-----------------------------------------|---------------------------|---------------------------|---------------------------|
|                  |                        |                                        | crude                                   | Adjusted (1)<br>‡         | Adjusted (2)              | Adjusted (3)              |
|                  | nmol/l                 | % (n/n <sub>total</sub> ) <sup>†</sup> |                                         |                           |                           |                           |
| OGTT criteria§   | <25                    | 5.5 (27/491)                           | 2.87<br>(1.46;5.62)                     | 2.51<br>(1.24;5.05)       | 2.59<br>(1.19;5.66)       | 2.49<br>(1.09;5.71)       |
|                  | ≥ 25-50                | 3.8 (54/1408)                          | 1.97<br>(1.07;3.63)                     | 1.75<br>(0.92;3.30)       | 1.76<br>(0.87;3.56)       | 1.79<br>(0.85;3.76)       |
|                  | ≥ 50-75                | 3.2 (38/1193)                          | 1.62<br>(0.86;3.07)                     | 1.63<br>(0.85;3.15)       | 1.94<br>(0.95;3.97)       | 1.83<br>(0.86;3.90)       |
|                  | ≥ 75                   | 2.0 (13/654)                           | 1.00<br>(reference)                     | 1.00<br>(reference)       | 1.00<br>(reference)       | 1.00<br>(reference)       |
|                  |                        |                                        | P=0.012                                 | P <sub>trend</sub> =0.001 | P <sub>trend</sub> =0.013 | P <sub>trend</sub> =0.047 |
|                  | Per 10 nmol/l increase |                                        | 0.89<br>(0.83;0.96)                     | 0.92<br>(0.85;0.99)       | 0.92<br>(0.85;1.01)       | 0.92<br>(0.84;1.01)       |
|                  |                        |                                        | P=0.002                                 | P=0.023                   | P=0.065                   | P=0.080                   |
| HbA1c criteria   | <25                    | 3.5 (17/486)                           | 1.61<br>(0.79;3.25)                     | 1.35<br>(0.65;2.80)       | 1.48<br>(0.66;3.33)       | 1.36<br>(0.57;3.27)       |
|                  | ≥ 25-50                | 3.7 (53/1444)                          | 1.69<br>(0.95;3.02)                     | 1.49<br>(0.81;2.74)       | 1.38<br>(0.70;2.71)       | 1.46<br>(0.72;2.97)       |
|                  | ≥ 50-75                | 2.4 (29/1223)                          | 1.08<br>(0.57;2.02)                     | 1.04<br>(0.55;2.00)       | 1.09<br>(0.54;2.23)       | 1.00<br>(0.47;2.16)       |
|                  | ≥ 75                   | 2.2 (15/680)                           | 1.00<br>(reference)                     | 1.00<br>(reference)       | 1.00<br>(reference)       | 1.00<br>(reference)       |
|                  |                        |                                        | P=0.12                                  | P <sub>trend</sub> =0.036 | P <sub>trend</sub> =0.17  | P <sub>trend</sub> =0.23  |
|                  | Per 10 nmol/l increase |                                        | 0.93<br>(0.86;1.00)                     | 0.95<br>(0.88;1.03)       | 0.95<br>(0.87;1.04)       | 0.95<br>(0.87;1.05)       |
|                  |                        |                                        | P=0.045                                 | P=0.23                    | P=0.27                    | P=0.33                    |

\*Abbreviations: 25(OH)D, 25-hydroxy-vitamin-D; OGTT, oral glucose tolerance test; HbA1c, glycosylated haemoglobin; OR, odds ratio; CI, confidence interval.

<sup>†</sup> N<sub>total</sub> in 25(OH)D subgroups may differ due to missing information on OGTT or HbA1c.

<sup>‡</sup> Models were adjusted for (1) season of blood collection, sex, age, family history of diabetes, BMI, and change in weight during follow-up; (2) plus leisure time physical activity, dietary habits, alcohol consumption, smoking status, total energy intake, and social class; (3) plus randomisation group, and self-reported changes in dietary habits, physical activity, smoking status, and alcohol consumption during follow-up.

§ Incident diabetes according to OGTT criteria was defined as fasting plasma glucose ≥7.0, 2-hour plasma glucose ≥11.1 mmol/l, self-reported development of diabetes during follow-up, or use of diabetes medication among those without diabetes according to OGTT criteria at baseline. Incident diabetes according to HbA1c criteria was defined as HbA1c ≥6.5% self-reported development of diabetes during follow-up, or use of diabetes medication among those without diabetes according to HbA1c criteria at baseline.
